# Supplementary material for: Arabidopsis thaliana glucuronosyltransferase in family GT14
Source: PubMed Central journal article supplement — Plant Signal Behav. 2014 Apr 16;9:e28891. doi: 10.4161/psb.28891 (PMC4091549; doi:10.4161/psb.28891), 2014-04-16
Supplement: psb-9-e28891-s01.pdf [file psb-9-e28891-s01.pdf]

## **Supplemental Material to:**

**Adiphol Dilokpimol and Naomi Geshi**

**Arabidopsis thaliana glucuronosyltransferase in family  
GT14**

**Plant Signaling & Behavior 2013; 9(4)**

**<http://dx.doi.org/10.4161/psb.28891>**

**[www.landesbioscience.com/journals/psb/article/28891](http://www.landesbioscience.com/journals/psb/article/28891)**

## Supplemental materials

### Materials and methods

#### DNA cloning

Cloning of *At5g39990* (*AtGlcAT14A*) has been described previously<sup>1</sup> *At3g24040* was cloned from *At3g24040* cDNA obtained from Nottingham Arabidopsis Stock Centre (<http://arabidopsis.info/>) using a forward primer containing the Gateway attB1 site (*italics*), FLAG tag (*double underline*) and a *At3g24040* coding sequence encoding amino acid from 30- (*single underline*): 5'-ACAAGTTTGTACAAAAAAGCAGGCTTCATGGATTACAAGGACGACGACAAGTCTTCCCAGTACTCTTCATCTTC-3' and a reverse primer containing the attB1 site (*italics*) and an *At3g24040* coding sequence including a stop codon (*underline*): 5'-ACCACTTTGTACAAGAAAGCTGGGTTTATTCAGGTACGCATTGGTGCAAT-3'. The PCR product was moved to a Gateway entry vector, pDONR223, by a BP clonase reaction (Life Technologies). The entry clone was further moved to the modified pPicZalphaA vector encoding the N-terminal FLAG tag<sup>1</sup> by a LR reaction (Life Technologies). Other Arabidopsis GT14 isoforms were codon-optimized for an expression in yeast and DNA-synthesized as soluble constructs, including the Gateway attL sites on both sides (GenScript Ltd., Hong Kong). The synthesized DNA was moved to the modified pPicZalphaA as described above.

| Gene      | Transmembrane domain | Gene synthesized    | Calculated MW |
|-----------|----------------------|---------------------|---------------|
| At4g27480 | -                    | 31-421              | 44708.9       |
| At4g03340 | 36-58                | 59-448              | 45741.9       |
| At3g03690 | 7-26                 | 27-378              | 41935.3       |
| At1g71070 | 7-29                 | 30-395              | 42738.4       |
| At3g24040 | 12-29                | 30-417 <sup>a</sup> | 44989.7       |
| At3g15350 | 12-34                | 35-424              | 45867.4       |
| At1g03520 | 37-59                | 60-447              | 45661.6       |
| At1g53100 | 24-46                | 47-423              | 44044.4       |
| At5g15050 | 22-44                | 45-434              | 45599.9       |
| At2g37585 | 12-34                | 35-384              | 41778.9       |

Above is the summary of (i) the sites of the predicted transmembrane domain in the full-length cDNA (indicated by the sites of amino acids); (ii) the corresponding amino acid sequences synthesized after codon optimization; and (iii) the predicted molecular weight (MW) for each recombinant protein as a fusion protein with a FLAG tag. <sup>a</sup>*At3g24040* was not codon-optimized but cloned manually from Arabidopsis cDNA as described above.

#### Preparation of recombinant GT14 isoforms

Transformation of the expression vectors to the *P. pastoris* KM71 strain, growth condition, protein purification using anti-FLAG antibody, and the Western blot analysis followed the methods described in Knoch et al.<sup>1</sup>. Estimation of the level of proteins was performed by the analysis of the Western blot images using ImageJ software<sup>2</sup>.

#### Enzyme assay

The enzyme assay basically followed the method described in<sup>1</sup>: in brief, the assay was performed in the presence of 0.1 mM UDP-<sup>14</sup>[C]-GlcA (containing 277.5 Bq of UDP-<sup>14</sup>[C]-GlcA), 20 mM Mcllvaine buffer, pH 5.0, 5 µl of affinity-purified recombinant proteins collected on anti-FLAG-agarose, and either the GAGP<sub>8</sub> or β-1,3-galactan acceptor<sup>3</sup>. Incubation was performed at 22°C for 16 h, and either the <sup>14</sup>[C]-GlcA incorporated products were collected in 70% (v/v) ethanol and subsequently treated with specific hydrolases and by size exclusion chromatography or the products were precipitated in the presence of 0.25 µl of 10 mg/ml horseradish peroxidase and 0.28 µl of 0.3% H<sub>2</sub>O<sub>2</sub>. The size exclusion chromatography was performed using Superdex Peptide HR 10/30 (GE Healthcare) and eluted by 50 mM ammonium formate (flow rate: 0.4 mL/min, 2 min/fraction). The [<sup>14</sup>C]-sugars were analyzed by scintillation counting.

## References

1. Knoch E, Dilokpimol A, Tryfona T, Poulsen CP, Xiong G, Harholt J, Petersen BL, Ulvskov P, Hadi MZ, Kotake T, et al. A  $\beta$ -glucuronosyltransferase from *Arabidopsis thaliana* involved in biosynthesis of type II arabinogalactan has a role in cell elongation during seedling growth. *Plant J* 2013; 76:1016–29.
2. Schneider CA, Rasband WS, Eliceiri KW. NIH Image to ImageJ: 25 years of image analysis. *Nat Methods* 2012; 9:671–5.
3. Geshi N, Johansen JN, Dilokpimol A, Rolland A, Belcram K, Verger S, Kotake T, Tsumuraya Y, Kaneko S, Tryfona T, et al. A galactosyltransferase acting on arabinogalactan protein glycans is essential for embryo development in *Arabidopsis*. *Plant J* 2013; 76:128–37.
